# Supplementary material for: Persistence of Plasmodium falciparum parasitemia after artemisinin combination therapy: evidence from a randomized trial in Uganda
Source: PubMed Central journal article supplement (PMC4873826; doi:10.1038/srep26330), 2016-05-20
Supplement: srep26330-s1.pdf [file srep26330-s1.pdf]

## Supplemental Data

### **Persistence of *Plasmodium falciparum* parasitemia after artemisinin combination therapy: evidence from a randomized trial in Uganda**

**Hsiao-Han Chang<sup>1\*</sup>, Elamaran Meibalan<sup>2\*</sup>, Justin Zelin<sup>2\*</sup>, Rachel Daniels<sup>2,3\*</sup>, Alice C. Eziefula<sup>4</sup>, Evan C. Meyer<sup>2</sup>, Fitsum Tadesse<sup>4</sup>, Lynn Grignard<sup>4</sup>, Regina Joice<sup>2</sup>, Chris Drakeley<sup>4</sup>, Dyann F. Wirth<sup>2,3</sup>, Sarah K. Volkman<sup>2,3,5</sup>, Caroline Buckee<sup>1</sup>, Teun Bousema<sup>4,6^</sup>, Matthias Marti<sup>2^</sup>**

<sup>1</sup>Center for Communicable Disease Dynamics, Department of Epidemiology and <sup>2</sup>Department of Immunology and Infectious Diseases, Harvard T.H. Chan School of Public Health, Boston, USA

<sup>3</sup>Broad Institute of MIT and Harvard, Cambridge, USA

<sup>4</sup>Immunology and Infection Department, London School of Hygiene and Tropical Medicine, London, UK

<sup>5</sup>Simmons College, Boston, USA

<sup>6</sup>Institute for Molecular Life Sciences, Radboud University, Nijmegen, The Netherlands

\*These authors contributed equally to this study

# Figure S1

**A**

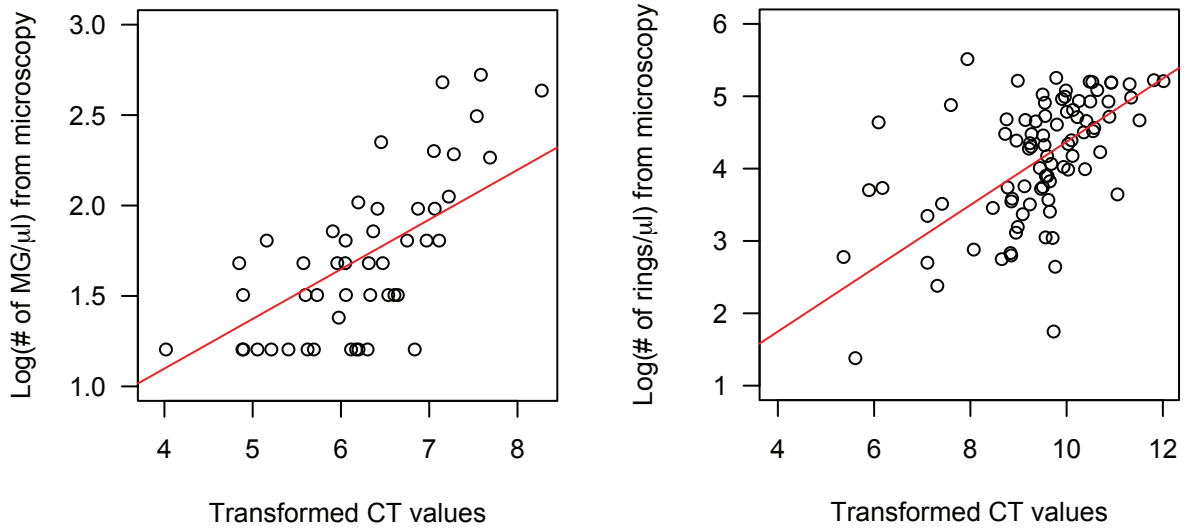

**B**

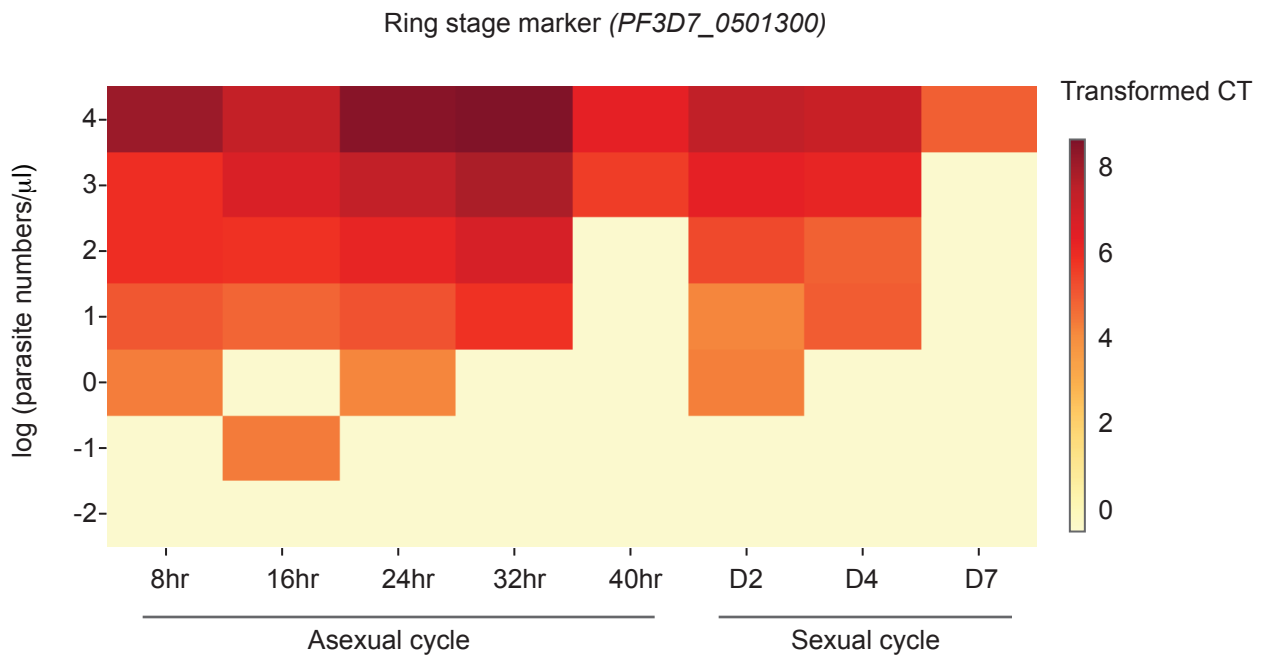

**Figure S2**

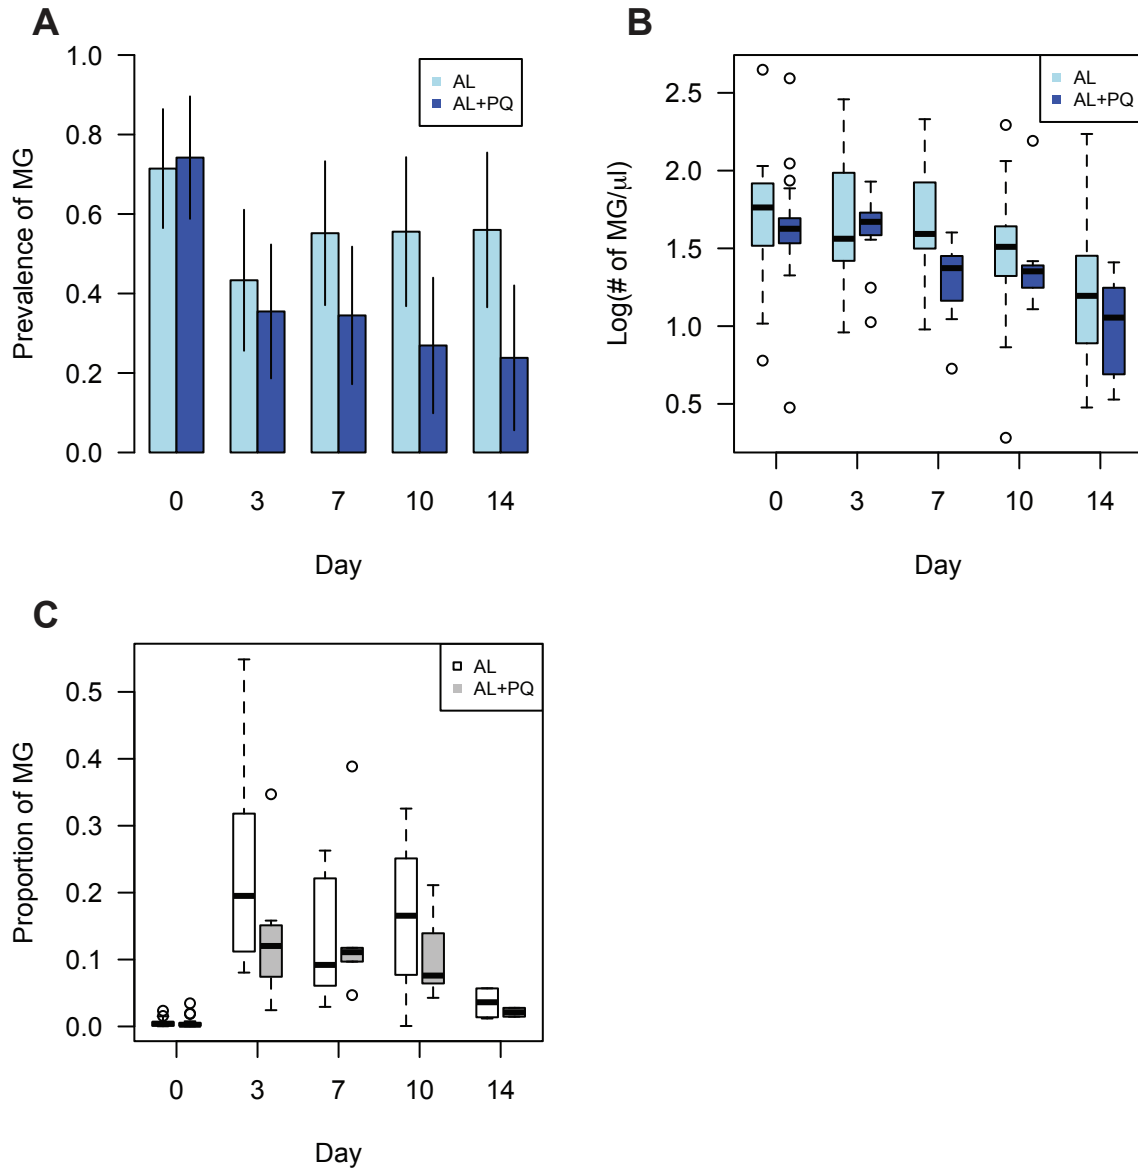

# Figure S3

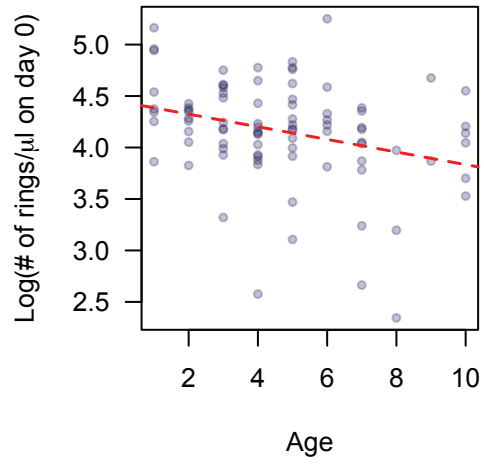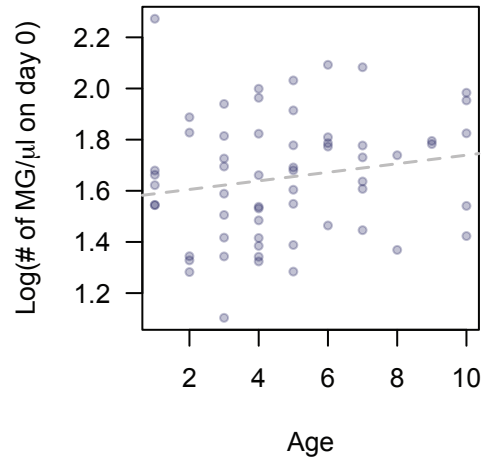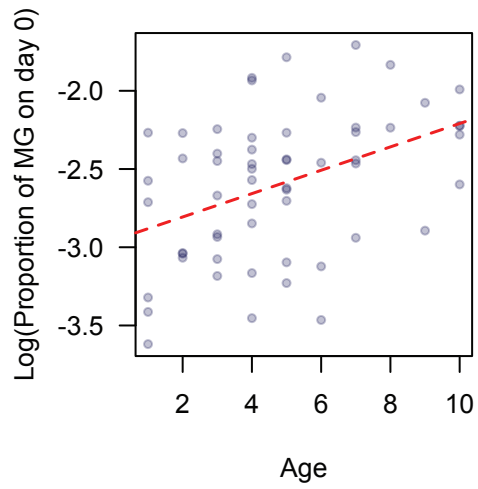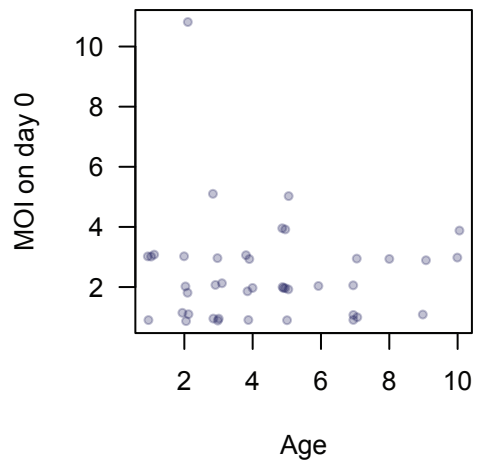

1 **Table S1. Persisting parasites are more likely to have certain *msp2* types**

| <b>Persisting parasite</b> | <b>Persisting on day</b> | <b># of persisters with this type</b> | <b># of persisters without this type</b> | <b># of non-persisters with this type</b> | <b># of non-persisters without this type</b> | <b>Fisher's exact test <i>p</i>-value</b> |
|----------------------------|--------------------------|---------------------------------------|------------------------------------------|-------------------------------------------|----------------------------------------------|-------------------------------------------|
| <b>3D7_275</b>             |                          |                                       |                                          |                                           |                                              |                                           |
| Ring                       | 10                       | 6                                     | 31                                       | 0                                         | 61                                           | 0.0022                                    |
| Ring                       | 14                       | 5                                     | 14                                       | 1                                         | 78                                           | 0.0009                                    |
| Gametocyte                 | 3                        | 6                                     | 37                                       | 0                                         | 55                                           | 0.00579                                   |
| Gametocyte                 | 10                       | 4                                     | 23                                       | 2                                         | 69                                           | 0.0472                                    |
| <b>Fc27_400</b>            |                          |                                       |                                          |                                           |                                              |                                           |
| Ring                       | 7                        | 8                                     | 36                                       | 2                                         | 52                                           | 0.039                                     |
| Ring                       | 10                       | 8                                     | 29                                       | 2                                         | 59                                           | 0.0056                                    |
| Ring                       | 14                       | 5                                     | 14                                       | 5                                         | 74                                           | 0.022                                     |

2

3

4

**Table S2. Characteristics of day 14 cleared and residual parasitemia\***

|                                                                            | Cleared<br>parasitemia | Residual<br>parasitemia | <i>p</i> -value |
|----------------------------------------------------------------------------|------------------------|-------------------------|-----------------|
| Number of patients (day 14)                                                | 55                     | 15                      |                 |
| Age                                                                        | 4                      | 5                       | 0.69            |
| Gender (male:female)                                                       | 26:29                  | 6:9                     | 0.77            |
| Asexual parasite density <sup>ϕ</sup> by<br>microscopy at enrolment median | 24500                  | 48530                   | 0.49            |
| Gametocyte prevalence by<br>microscopy at enrollment                       | 38%                    | 40%                     | 1               |
| Gametocyte prevalence by<br>microscopy at day 7                            | 6.98%                  | 7.14%                   | 1               |
| Treatment, % AL+PQ treated                                                 | 51%                    | 40%                     | 0.56            |
| MOI at enrollment                                                          | 2                      | 2                       | 0.46            |

<sup>ϕ</sup> Unit of parasite density is the number of parasites per  $\mu$ l.

\* Medians are shown if not mentioned.

## Supplemental figure legends

**Figure S1. (A) Regression for ring and mature gametocyte stages based on the correlation between microscopy and qRT-PCR.** The intercept was forced to be zero because parasite density is expected to be zero when transformed CT value is 0. Transformed CT value ( $CT^*$ ) =  $\log(2^{-CT}) + 17$ . The fitted function for ring density (per  $\mu\text{l}$ ) =  $10^{CT^* \times 0.4371}$  and the fitted function for MG density (per  $\mu\text{l}$ ) =  $10^{CT^* \times 0.2746}$ . The  $p$ -values for the slopes are both smaller than  $2 \times 10^{-16}$ . The correlation coefficients  $r$  between microscopy and qRT-PCR are 0.71 ( $p$ -value =  $1.4 \times 10^{-8}$ ) and 0.53 ( $p$ -value =  $1.1 \times 10^{-7}$ ), respectively. **(B) Sensitivity of ring stage marker across the *P. falciparum* red blood cell cycle.** Ring marker can detect up to 0.1 parasite/ $\mu\text{l}$  (16 hr time point). Ring marker transcript in mature gametocytes is only detected when numbers are  $>1000$  parasites/ $\mu\text{l}$  (day 7 time point). Notably, gametocyte numbers in the patients are  $<100$  gametocytes/ $\mu\text{l}$ .

**Figure S2. Changes in asexual and sexual stage parasite prevalence over time based on Pfs25 QT-NASBA data** <sup>13</sup>. **(A)** The prevalence of mature gametocytes (MG) decreases more rapidly in the AL-primaquine (AL + PQ) group (the slope of simple linear regression =  $-0.0048$  (95% CI =  $[-0.024, 0.015]$ ) for the AL group and  $-0.031$  [95% CI =  $[-0.053, -0.0076]$  for the AL+PQ group). **(B)** The number of mature gametocytes after day 3 is significantly smaller in the AL+PQ group ( $p$ -value = 0.023). **(C)** The proportion of the total parasite population that is mature gametocytes increases during follow-up (Mann-Whitney test,  $p$ -values =  $1.93 \times 10^{-11}$  [AL] and  $9.23 \times 10^{-12}$  [AL+PQ]). There is no patient in the AL+PQ group having both rings and MG data on day 14.

**Figure S3. Age versus parasite density and MOI.** Ring density decreases with age (Pearson's correlation test between log of the number of rings and age,  $r = -0.30$ ,  $p$ -value = 0.0049) while mature gametocyte density (Pearson's correlation test between log of the number of MG and age,  $r = 0.18$ ,  $p$ -value = 0.17) and MOI (Spearman's rank correlation test,  $p$ -value = 0.71) do not, leading to the increase in the proportion of mature gametocytes with age.
